# Supplementary material for: Zika Virus Infection of Sertoli Cells Alters Protein Expression Involved in Activated Immune and Antiviral Response Pathways, Carbohydrate Metabolism and Cardiovascular Disease
Source: MDPI journal article supplement (doi:10.3390/v14020377), 2022-02-11
Supplement: s1 [file s1]

Supplementary Materials

# Zika Virus Infection of Sertoli Cells Alters Protein Expression Involved in Activated Immune and Antiviral Response Pathways, Carbohydrate Metabolism and Cardiovascular Disease

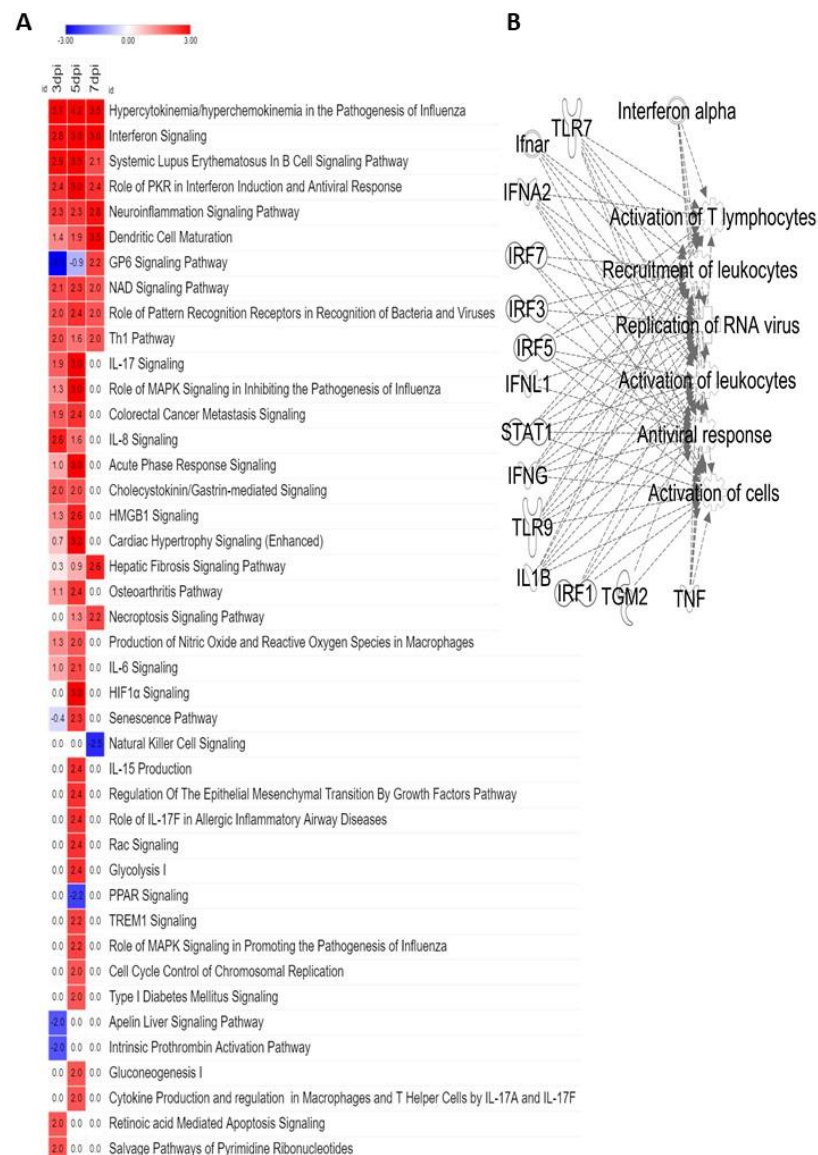

**Figure S1.** (A) Comparison of canonical pathways affected at 3, 5 and 7 dpi during ZIKV infection in HSerC. Red indicates up-regulation, blue indicates down-regulation. Numbers in the boxes show the significance of alteration measured by Z-score. (B) Top 15 upstream regulators associated with cellular function and disease.

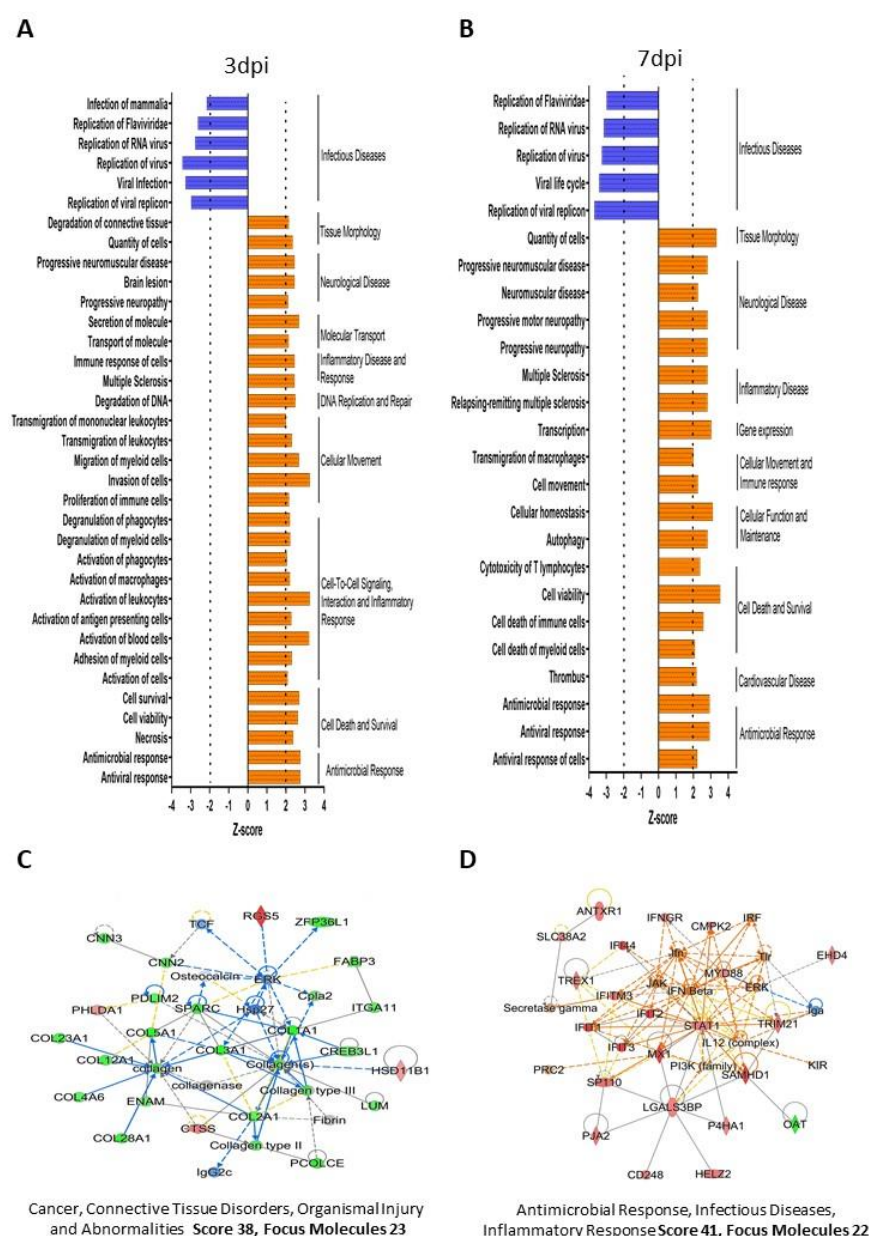

**Figure S2.** IPA-predicted activation and inhibition of bio-functions, and protein–protein network at 3 and 7 dpi in HSerC. Top bio-functions and their predicted activation or inhibition Z-scores indicated at (A) 3 and (B) 7 dpi. Activation is indicated by positive Z-Score and the inhibited bio-functions are indicated by negative Z-scores. The most effected protein–protein networks at (C) 3 dpi and (D) 7 dpi by ZIKV infection in HSerC. Red and green represent up-regulation and down-regulation, respectively; gray proteins denote that they were recognized in the present study, but not significantly regulated; colorless proteins interact with molecules in the network, but were not identified in our study. Abbreviations: dpi = Days post infection.

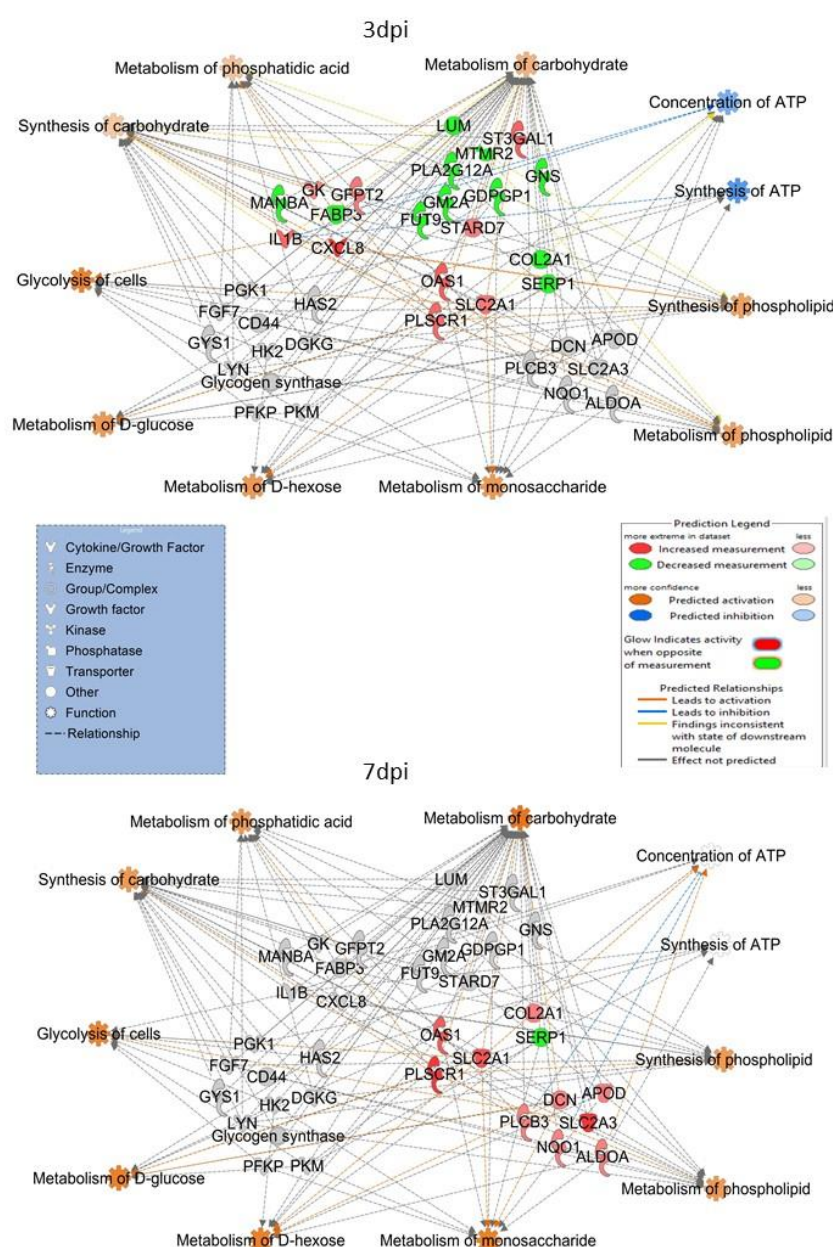

**Figure S3.** Proteins involved in the metabolism of carbohydrate and energy production in cells affected by ZIKV infection at 3 dpi and 7 dpi. Red and green represent up-regulation and down-regulation, respectively; gray proteins denote that they were recognized in the present study, but not significantly regulated; colorless proteins interact with molecules in the network, but were not identified in our study. Abbreviations: dpi = Days post infection.
