# Supplementary material for: Zika Virus Infection of Sertoli Cells Alters Protein Expression Involved in Activated Immune and Antiviral Response Pathways, Carbohydrate Metabolism and Cardiovascular Disease
Source: Viruses. 2022 Feb 11;14(2):377. doi: 10.3390/v14020377 (PMC8878972; doi:10.3390/v14020377)
Supplement: Supplementary file 1 [file viruses-14-00377-s001.zip]

Archive with 4 entries (4 files):
- viruses-1572177-Table S1.xls
- viruses-1572177-Table S2.xls
- viruses-1572177-Table S3.xls
- viruses-1572177-suppl.pdf
