# Supplementary material for: Zika Virus Infection of Sertoli Cells Alters Protein Expression Involved in Activated Immune and Antiviral Response Pathways, Carbohydrate Metabolism and Cardiovascular Disease
Source: Viruses. 2022 Feb 11;14(2):377. doi: 10.3390/v14020377 (PMC8878972; doi:10.3390/v14020377)
Supplement: Supplementary file 1 [file viruses-14-00377-s001.zip › viruses-1572177-Table S1.xls]

## Sheet: Sheet0
Table S1. Disease and functions affected by ZIKV infection in human Sertoli cells.
Diseases and Bio Functions	3dpi (Z-score)	5dpi (Z-score)	7dpi (Z-score)
Secretion of molecule	2.691	N/A	N/A
Migration of myeloid cells	2.691	N/A	N/A
Degradation of DNA	2.496	N/A	N/A
Activation of macrophages	2.206	N/A	N/A
Degradation of connective tissue	2.155	N/A	N/A
Transport of molecule	2.143	N/A	N/A
Vascularization of absolute anatomical region	2.111	N/A	N/A
Transmigration of mononuclear leukocytes	2.005	N/A	N/A
Non-traumatic arthropathy	1.982	N/A	N/A
Degranulation of granulocytes	1.982	N/A	N/A
Inflammation of the large intestine	-2.532	N/A	N/A
Gastroenteritis	-2.551	N/A	N/A
Cell survival	2.701	4.151	N/A
Invasion of breast cancer cell lines	N/A	3.034	N/A
Metabolism of reactive oxygen species	N/A	2.892	N/A
Immune response of leukocytes	1.947	2.816	N/A
Cell movement of carcinoma cell lines	N/A	2.809	N/A
Immune response of cells	2.449	2.808	N/A
Synthesis of reactive oxygen species	N/A	2.744	N/A
Organization of cytoplasm	N/A	2.692	N/A
Binding of blood cells	N/A	2.583	N/A
Migration of carcinoma cell lines	N/A	2.545	N/A
Proliferation of smooth muscle cells	N/A	2.541	N/A
Neoplasia of tumor cell lines	1.843	2.536	N/A
Nervous system neoplasm	1.316	2.534	N/A
Immune response of phagocytes	1.88	2.53	N/A
Adhesion of blood cells	N/A	2.469	N/A
Accumulation of neutrophils	N/A	2.416	N/A
Allergy	1.02	2.396	N/A
Central nervous system solid tumor	1.671	2.343	N/A
Cell cycle progression	N/A	2.319	N/A
Inflammatory demyelinating disease	N/A	2.236	N/A
Upper gastrointestinal tract cancer	N/A	2.236	N/A
Non-colon gastrointestinal cancer	N/A	2.236	N/A
Migration of phagocytes	1.228	2.225	N/A
Large intestine neoplasm	1.98	2.219	N/A
Cell movement of granulocytes	1.958	2.192	N/A
Migration of breast cancer cell lines	N/A	2.159	N/A
Damage of cartilage tissue	1.949	2.155	N/A
Brain lesion	2.449	2.138	N/A
Recruitment of cells	N/A	2.121	N/A
Cell movement of breast cancer cell lines	N/A	2.103	N/A
Degranulation of myeloid cells	2.219	2.091	N/A
Cell movement of neutrophils	1.729	2.077	N/A
Degranulation of phagocytes	2.207	2.073	N/A
Proliferation of tumor cells	N/A	2.069	N/A
Recruitment of neutrophils	N/A	2.058	N/A
Development of body trunk	-0.111	2.009	N/A
Brain tumor	N/A	2	N/A
Colon tumor	1.982	2	N/A
Quantity of MHC Class I on cell surface	N/A	1.981	N/A
Development of hematopoietic system	N/A	1.96	N/A
Head and neck tumor	1.982	1.912	N/A
Wound	1.98	1.686	N/A
Transmigration of leukocytes	2.306	1.582	N/A
Liver Damage	1.979	1.349	N/A
Adhesion of myeloid cells	2.308	1.043	N/A
Calcinosis	-1.982	0.329	N/A
Hereditary connective tissue disorder	1.982	0.314	N/A
Non-Hodgkin lymphoma	N/A	-1.982	N/A
Enteritis	-2.47	-2.08	N/A
Cell death of carcinoma cell lines	N/A	-2.132	N/A
Inflammation of gastrointestinal tract	-2.702	-2.167	N/A
B-cell lymphoma	N/A	-2.219	N/A
Infection by Orthomyxoviridae	N/A	-2.236	N/A
Survival of organism	0.284	0.75	3.618
Cell viability	2.628	4.114	3.54
Cell viability of tumor cell lines	N/A	3.205	3.395
Quantity of cells	2.358	3.256	3.329
Cellular homeostasis	N/A	2.763	3.108
Quantity of connective tissue	N/A	1.414	3.054
Transcription	N/A	N/A	3.023
Antimicrobial response	2.756	N/A	2.93
Antiviral response	2.756	2.921	2.93
Autophagy	N/A	N/A	2.815
Relapsing-remitting multiple sclerosis	N/A	N/A	2.813
Progressive neuropathy	2.121	N/A	2.813
Multiple Sclerosis	2.449	2.236	2.813
Progressive neuromuscular disease	2.449	2.236	2.813
Progressive motor neuropathy	1.89	1.633	2.813
Cell death of blood cells	1.574	2.59	2.751
Autophagy of cells	N/A	N/A	2.696
Cell death of immune cells	1.498	2.455	2.576
Cell movement of tumor cell lines	1.144	3.009	2.485
Advanced extracranial solid tumor	0.767	1.082	2.401
Cytotoxicity of T lymphocytes	N/A	N/A	2.395
Cell proliferation of tumor cell lines	N/A	3.321	2.357
Quantity of connective tissue cells	N/A	N/A	2.348
Quantity of blood cells	1.677	2.019	2.308
Cell movement	0.338	2.153	2.264
Neuromuscular disease	N/A	2.828	2.259
Antiviral response of cells	N/A	N/A	2.219
Thrombus	N/A	N/A	2.177
Cytotoxicity of cytotoxic T cells	N/A	N/A	2.177
Advanced malignant solid tumor	0.824	1.449	2.156
Growth of tumor	1.315	2.258	2.151
Migration of tumor cell lines	N/A	3.055	2.111
Cell death of myeloid cells	N/A	N/A	2.087
Quantity of mononuclear leukocytes	1.331	N/A	2.054
Quantity of bone	N/A	N/A	2.004
Transmigration of macrophages	N/A	N/A	2
Activation of cells	2.089	1.52	1.891
Migration of cells	0.55	2.025	1.65
Migration of mononuclear leukocytes	1.089	1.992	1.529
Hypersensitive reaction	1.22	1.973	1.432
Interaction of protein	0.446	2.043	1.4
Activation of antigen presenting cells	2.281	N/A	1.083
Cell death of tumor cell lines	0.706	-2.049	0.962
Cell movement of mononuclear leukocytes	1.437	2.229	0.953
Necrosis	2.385	0.12	0.894
Activation of phagocytes	2.058	N/A	0.841
Activation of blood cells	3.219	2.222	0.822
Activation of leukocytes	3.256	2.39	0.761
Invasion of tumor cell lines	2.843	4.16	0.673
Pelvic tumor	1.977	1.572	0.616
Cell movement of lymphocytes	0.987	1.976	0.586
Invasion of cells	3.25	4.193	0.469
Binding of leukocytes	N/A	2.825	0.134
Ovarian tumor	N/A	2.433	0.129
Adhesion of immune cells	N/A	2.739	0.016
Colorectal tumor	1.98	2.219	0
Proliferation of immune cells	2.165	1.094	-0.012
Progression of tumor	N/A	1.97	-0.555
Malignant neoplasm of large intestine	N/A	2	-1
Colorectal cancer	N/A	2	-1
Benign lesion	1.582	2.166	-1.137
Viral Infection	-3.271	-1.887	-1.181
Gastrointestinal tract cancer	1.432	2.157	-1.342
Replication of Herpesviridae	-2.335	-2.353	-1.569
Liquid tumor	N/A	0.277	-1.982
Systemic lupus erythematosus	N/A	-0.117	-1.982
Progression of benign tumor	N/A	N/A	-2
Replication of Murine herpesvirus 4	-2.449	N/A	-2
Inflammation of body cavity	-1.935	-2.182	-2.031
Infection by coronavirus	-1.477	-1.309	-2.043
Frequency of tumor	0.128	-0.904	-2.051
Adenoma	0	N/A	-2.062
Development of malignant tumor	-0.507	-1.109	-2.123
Development of carcinoma	0.352	-0.025	-2.189
Development of adenocarcinoma	-0.624	-0.842	-2.191
Adenocarcinoma	-0.819	-0.381	-2.359
Colitis	N/A	-2.184	-2.398
Infection of mammalia	-2.155	-2.68	-2.418
Anemia	N/A	N/A	-2.425
Tumorigenesis of epithelial neoplasm	0.845	0.472	-2.433
Inflammation of absolute anatomical region	-1.148	-2.084	-2.487
Inflammation of organ	-1.302	-2.059	-2.658
Carcinoma	-0.597	0.268	-2.757
Replication of Hepatitis C virus	-2.429	-2.443	-2.865
Replication of Flaviviridae	-2.615	-2.626	-2.983
Replication of RNA virus	-2.76	-1.485	-3.149
Replication of virus	-3.431	-2.322	-3.259
Viral life cycle	N/A	-2.969	-3.408
Replication of viral replicon	-2.969	-2.952	-3.69
Organismal death	0.925	-3.864	-4.453
Morbidity or mortality	N/A	-3.813	-4.489
dpi=days post infection.
