# Supplementary material for: Zika Virus Infection of Sertoli Cells Alters Protein Expression Involved in Activated Immune and Antiviral Response Pathways, Carbohydrate Metabolism and Cardiovascular Disease
Source: Viruses. 2022 Feb 11;14(2):377. doi: 10.3390/v14020377 (PMC8878972; doi:10.3390/v14020377)
Supplement: Supplementary file 1 [file viruses-14-00377-s001.zip › viruses-1572177-Table S2.xls]

## Sheet: Sheet0
Table S2. IPA predicted the upstream regulators dysregulated by ZIKV infection in Sertoli cells
Upstream Regulators	3dpi (Z-score)	5dpi (Z-score)	7dpi (Z-score)
IRGM	-4.941	-5.234	-5.138
MAPK1	-4.165	-4.115	-4.91
filgrastim	-3.935	-4.822	-4.848
Irgm1	-4.398	-4.785	-4.401
RC3H1	-4.583	-5	-4.243
IL1RN	-4.795	-4.722	-4.243
ETV6-RUNX1	-2.707	-3.993	-4.094
TRIM24	-3.446	-4.533	-3.877
SB203580	-3.326	-3.619	-3.839
NKX2-3	-4.004	-3.729	-3.8
SIRT1	-3.435	-4.604	-3.755
PNPT1	-3.101	-2.717	-3.742
miR-182-5p (and other miRNAs w/seed UUGGCAA)	-3.606	-3.742	-3.705
SOCS1	-2.605	-3.382	-3.552
ACKR2	-3.742	-3.873	-3.464
PD98059	-3.988	-5.139	-3.378
IKZF1	-2.159	-1.364	-3.25
SP110	-3.464	-3.051	-3.051
LY294002	-1.528	-2.425	-3.043
NRAS	-0.984	-1.183	-2.8
miR-199a-5p (and other miRNAs w/seed CCAGUGU)	-0.213	-0.213	-2.795
docosahexaenoic acid	0.522	-1.09	-2.765
TREX1	-2.921	-2.921	-2.757
IRF4	-0.5	-1.566	-2.619
BTK	-3.207	-1.761	-2.525
CST5	0	-0.333	-2.449
ACOX1	1.633	0	-2.433
DUSP11	-2.619	-2.8	-2.425
let-7	0.147	-1.897	-2.425
ISG15	-2.415	-2.415	-2.416
pyrrolidine dithiocarbamate	-1.621	-1.735	-2.415
SMAD7	1.171	-0.023	-2.4
actinomycin D	-1.822	-1.514	-2.382
fulvestrant	0.493	0.666	-2.36
tamoxifen	1.412	1.489	-2.333
PTGER4	-3.202	-2.708	-2.309
COL18A1	-2.425	-2.985	-2.236
AIRE	-2.449	-2.121	-2.236
dexamethasone	-3.893	-4.655	-2.233
2-aminopurine	-2.767	-3.101	-2.226
USP18	-2.219	-2.621	-2.219
STEAP3	2.219	0.555	-2.219
SOCS3	-2.942	-3.111	-2.216
Sb202190	-1.461	-1.808	-2.213
POR	-0.283	N/A	-2.213
Alpha catenin	0.374	-0.975	-2.207
PRDM16	-2.203	-2.4	-2.203
Y 27632	1.424	0.291	-2.183
miR-155-5p (miRNAs w/seed UAAUGCU)	-2.183	-3.232	-2.177
let-7a-5p (and other miRNAs w/seed GAGGUAG)	3.042	0.889	-2.167
miR-141-3p (and other miRNAs w/seed AACACUG)	0.958	N/A	-2.165
GAPDH	-2.795	-1.646	-2.137
mifepristone	-0.591	-0.708	-2.137
ziritaxestat	-3.051	-3.051	-2.111
losartan potassium	1.203	0.13	-2.109
U0126	-3.025	-4.266	-2.081
plicamycin	1.067	-0.496	-2.049
PPARG	-0.548	0.531	-2.036
salirasib	-0.816	-2.53	-2
fontolizumab	-2	-2.449	-2
FBXO44	-2	-2	-2
TIMP3	N/A	-1.982	-2
mir-10	N/A	-0.555	-2
SP2509	N/A	-0.086	-2
EFNA2	0	0	-2
halofuginone	0.57	0.243	-2
EFNA1	0	0.378	-2
EFNA4	0	0.378	-2
EFNA3	0	0.378	-2
ramipril	1.912	0.426	-2
EFNA5	0.378	0.707	-2
HIC1	N/A	N/A	-2
miR-291a-3p (and other miRNAs w/seed AAGUGCU)	N/A	-2.217	-1.993
mir-146	-1.957	-2.405	-1.992
miR-30c-5p (and other miRNAs w/seed GUAAACA)	1.397	-0.457	-1.992
KDM5B	-1.311	-2.626	-1.987
ADAM12	0.728	0.915	-1.987
GFI1	-2.213	-2.36	-1.982
PIK3CG	-1.446	-2.252	-1.982
IKZF3	-1.664	-1.982	-1.982
TAB1	-1.553	-1.582	-1.982
IRF8	-0.029	0.048	-1.982
ABCB4	2.065	0.901	-1.981
MM-589	2.213	0.97	-1.98
PTC-209	2.213	1.254	-1.98
phenethyl isothiocyanate	N/A	N/A	-1.977
JQ1	-2.945	-3.075	-1.976
valsartan	-1.274	-1.524	-1.974
APOE	-1.076	-0.803	-1.969
fasudil	0.391	-0.218	-1.969
NLRX1	-2.2	-2.563	-1.964
SMARCA5	-1.4	-2.414	-1.964
ATG7	0.555	0.94	-1.964
miR-29b-3p (and other miRNAs w/seed AGCACCA)	2.095	0.19	-1.934
ITGB1	2.717	1.964	-1.822
mir-21	-1.93	-2.965	-1.775
sirolimus	-0.564	-2.194	-1.751
ZBTB16	-2.204	-2.077	-1.691
genistein	-2.91	-1.874	-1.682
NGLY1	-1.98	-1.868	-1.666
N-acetyl-L-cysteine	-2.253	-2.182	-1.528
SP600125	-1.02	-2.342	-1.497
ESR1	-2.613	-1.756	-1.491
IL10RA	-3.729	-3.988	-1.463
PGR	-2.187	-0.984	-1.338
N-Ac-Leu-Leu-norleucinal	-2.579	-2.039	-1.22
STAT6	-2.647	-2.777	-1.205
YBX1	2.165	2.373	-1.181
SB-431542	2.771	1.873	-1.154
Nr1h	-2.226	-3.614	-1.109
triptolide	-1.459	-2.825	-1.067
tyrphostin AG 1478	-2.013	-2.031	-1.067
FOS	3.241	3.04	-1.067
UCP1	-2.236	-1.571	-1
RUNX3	2.345	1.969	-0.927
AR	-2.612	-0.468	-0.911
TP63	1.047	3.104	-0.77
FAS	2.087	1.671	-0.726
IL4	-2.585	-0.441	-0.683
MYCN	2.674	1.614	-0.677
BCL6	-2.599	-3.055	-0.64
OGA	2.496	0.134	-0.632
CYP19A1	1.982	1.633	-0.6
C5AR1	0.686	1.98	-0.577
DICER1	-0.513	-2.003	-0.555
AHR	2.885	2.766	-0.515
HRAS	3.778	3.538	-0.47
etoposide	0.745	2.091	-0.464
RELA	3.896	4.825	-0.463
vorinostat	-2.146	0.168	-0.418
molybdenum disulfide	3.962	4.041	-0.378
forskolin	2.419	3.429	-0.352
CLDN7	-1.673	-2.377	-0.343
ERK1/2	0.286	2.001	-0.338
TP73	-2.025	-0.723	-0.318
H-7	-2.213	-2.425	-0.283
CEBPA	1.143	2.206	-0.174
Am 580	2	N/A	-0.159
HOTAIR	-1.136	-2.138	-0.151
SP3	1.463	2.204	-0.111
RFX5	1.984	1.984	-0.1
Ro31-8220	-2.399	-2.876	0
elaidic acid	-2.236	-1.342	0
NFKB1	2.517	2.011	0
SMPD1	N/A	2.434	0
MIF	2.506	3.013	0.051
atorvastatin	-1.974	-2.002	0.179
SQSTM1	N/A	-1.969	0.191
AG490	-2.843	-3.41	0.218
prostaglandin E2	3.403	2.769	0.254
IL12 (complex)	1.612	2.237	0.285
PIK3R1	2.559	1.805	0.323
calcitriol	-2.627	-1.598	0.377
ciprofibrate	-2.121	-1.134	0.38
Akt	-0.043	2.077	0.441
REL	2.189	2.54	0.447
paclitaxel	2	3.561	0.468
D-glucose	-2.009	0.144	0.496
AKT1	1.05	2.242	0.524
S100A9	2.726	2.925	0.555
S100A8	2.562	3.117	0.555
IL6R	1.659	2.092	0.642
arsenic trioxide	2.058	3.195	0.696
TP53	-2.639	-0.914	0.74
tunicamycin	0.965	2.405	0.745
CIITA	2.202	2.202	0.755
C5	2.382	2.607	0.849
glucocorticoid	-2.445	-2.582	0.923
diethylstilbestrol	-1.75	-2.333	0.938
PARP1	2.583	1.621	0.975
HMGB1	2.53	2.882	1
cyclic AMP	2.371	2.379	1.026
EGR1	0.55	2.915	1.059
VCAN	2.503	2.69	1.08
sulforafan	-1.989	-1.067	1.117
THPO	0.99	1.997	1.131
TCR	N/A	2.602	1.131
E. coli serotype 0127B8 lipopolysaccharide	2.646	2.53	1.134
IL17A	2.733	2.911	1.15
MAPK8	2.024	1.432	1.172
hydrogen peroxide	1.635	2.014	1.191
MAP3K7	2.6	1.821	1.219
STAT3	0.774	2.01	1.251
bucladesine	2.375	2.629	1.253
RICTOR	0.817	2.035	1.276
HGF	3.011	3.419	1.332
VEGFA	2.331	1.599	1.338
FGF2	2.676	3.1	1.373
L-triiodothyronine	2.068	1.103	1.392
CD40LG	2.781	3.419	1.4
JUN	2.471	3.311	1.415
IL7	1.964	2.18	1.467
CSF1	0.426	2.522	1.539
SRC	2.569	3.178	1.581
FSH	2.705	2.624	1.61
KLF6	1.612	2.038	1.622
IL1	2.315	4.453	1.638
PI3K (family)	2.3	2.545	1.709
ERK	0.807	2.947	1.717
camptothecin	2.893	3.707	1.786
Vegf	3.386	3.603	1.795
IL2	3.25	3.712	1.82
phytohemagglutinin	N/A	3.061	1.89
hydroxyurea	3.113	2.714	1.912
EIF4E	1.48	2.534	1.915
cytokine	2.665	3.344	1.941
CSF2	1.965	3.401	1.941
homocysteine	2.165	2.345	1.944
LDL	1.215	2.549	1.95
FOXO3	1.375	2.479	1.951
IFIH1	2.592	2.914	1.954
POU2AF1	1.96	2.19	1.96
Tnf (family)	2.628	3.158	1.96
cobalt chloride	1.427	3.231	1.96
IFNA21	1.961	1.961	1.961
IFNA10	1.961	1.961	1.961
IFNA14	1.961	1.961	1.961
IFNA7	1.961	1.961	1.961
IFNA16	1.961	1.961	1.961
IFNA5	1.961	1.961	1.961
IFNA6	1.961	1.961	1.961
RAC1	0.62	0.814	1.964
ARNT	1.159	2.343	1.964
ZEB1	-1.318	-1.414	1.969
GATA6	-1.977	-1.182	1.969
MRTFA	-0.549	-0.639	1.97
NCOA3	-0.312	0.835	1.972
IFNA8	1.977	1.977	1.977
F2R	1.184	2.491	1.98
SRF	-1.856	-2.292	1.982
FGF7	-0.176	0.268	1.982
ITK	N/A	1.293	1.982
mycophenolic acid	1.667	1.872	1.982
Duxbl1 (includes others)	1.982	1.982	1.982
Map3k7	1.62	2.075	1.982
CLEC12A	N/A	N/A	1.982
paraquat	0.492	0.404	1.987
HDAC4	0.221	0.451	1.987
F3	1.103	2.36	1.992
BMP2	-1.433	0.205	1.994
CX3CL1	-0.096	-1.195	2
Calcineurin A	-0.816	-0.816	2
RETNLB	-0.447	0.213	2
BRD4	-0.12	0.577	2
IFN Lambda	2	2	2
3M-011	2.2	2.414	2
trovafloxacin	2.121	2.53	2
3M-001	2.433	2.813	2
CHUK	2.64	4.241	2.013
CD3	2.711	4.441	2.03
Jnk	1.377	1.84	2.047
IL15	1.132	3.07	2.114
TNFSF10	3.339	4.006	2.121
ERBB2	2.124	2.223	2.13
E2F1	1.467	1.927	2.135
FN1	1.129	1.65	2.147
SMAD3	-1.877	-0.343	2.157
nicotine	0.076	0.386	2.157
nitric oxide	0.753	2.428	2.162
MAP2K1	0.39	1.743	2.17
IKBKG	0.394	2.517	2.172
ETS1	-0.895	0.264	2.18
TGFB3	-1.474	0.089	2.191
IRF9	2.209	2.411	2.194
ATF4	1.026	2.48	2.197
KAT2B	1	1.606	2.2
ISGF3	1.964	1.964	2.2
Pdgf (complex)	1.486	3.056	2.2
SMAD1	-1.561	-1.491	2.207
IFNL3	2.185	2.185	2.207
FOXO1	1.157	2.459	2.207
CD38	N/A	1.269	2.208
PRKCA	1.89	1.752	2.208
PF4	1.704	1.998	2.209
EPAS1	2.542	2.393	2.213
aphidicolin	2.425	2.772	2.213
tributyrin	2.204	2.934	2.213
DUSP1	-0.131	-1.294	2.219
TRAF3IP2	0.57	0.69	2.219
JAK1/2	1.982	2.138	2.219
Ap1	2.398	3.075	2.219
mir-15	1.414	1.857	2.224
NLRP12	0.53	0.048	2.226
FADD	1.667	1.732	2.236
MSC	1.633	2.121	2.236
IFNK	2.236	2.236	2.236
SNCA	1.906	2.388	2.236
NOS2	1.947	2.736	2.236
prexasertib	2.333	3.317	2.236
5-O-mycolyl-beta-araf-(1->2)-5-O-mycolyl-alpha-araf-(1->1')-glycerol	2.879	3.5	2.236
EP300	0.408	2.176	2.302
SMARCB1	0.302	-0.062	2.325
TGFB2	-1.745	-0.976	2.344
ANGPT2	1.549	1.925	2.379
Ins1	-0.118	0.169	2.388
EDN1	1.003	1.99	2.388
SGPL1	1.755	1.977	2.401
EBI3	2.778	2.778	2.401
Pkc(s)	-0.29	0.021	2.426
cocaine	2.648	2.511	2.429
RARB	1.511	0.988	2.433
ARNT2	0.707	1.897	2.449
emactuzumab	2	2.828	2.449
Salmonella enterica serotype abortus equi lipopolysaccharide	3.223	3.681	2.449
beta-estradiol	-1.695	0.617	2.483
Tgf beta	-1.516	0.486	2.496
cigarette smoke	1.934	2.925	2.513
8-bromo-cAMP	-0.794	1.232	2.525
EGFR	1.919	2.031	2.525
IKBKB	2.222	3.315	2.525
TGFB1	-2.915	-0.547	2.53
APP	4.069	4.009	2.53
NFATC2	2.569	2.355	2.54
IL1A	4.107	4.552	2.557
metribolone	N/A	2.561	2.569
STAT2	2.75	3.067	2.572
POU5F1	2.453	3.395	2.58
NCOA2	1.071	1.504	2.586
NLRC5	2.695	2.582	2.589
CCN2	-1.516	0.054	2.597
NRG1	0.676	1.396	2.599
IFN alpha/beta	2.414	2.789	2.607
3,3'-diindolylmethane	1.369	1.377	2.608
PRKCD	1.859	2.437	2.608
MYD88	3.384	4.237	2.608
imiquimod	3.685	3.671	2.637
IFNAR2	2.449	2.333	2.646
pembrolizumab	2.345	2.813	2.646
JAK1	3.253	3.065	2.646
aldesleukin	2.813	3.148	2.646
FCGR2A	3.086	3.664	2.646
doxorubicin	-0.352	2.982	2.66
PML	4.53	3.917	2.66
PDGF BB	1.384	3.722	2.669
carbon tetrachloride	0.736	0.725	2.687
CEBPB	1.387	2.936	2.689
decitabine	-0.509	1.707	2.694
IFNAR1	3.563	3.177	2.709
G protein alphai	2.575	3.563	2.724
IFNA4	2.548	2.728	2.728
TLR4	3.229	3.441	2.768
E. coli B5 lipopolysaccharide	2.38	2.361	2.777
Ifn gamma	2.917	3.105	2.777
CGAS	2.969	3.286	2.782
salmonella minnesota R595 lipopolysaccharides	3.538	4.375	2.782
IL6	1.449	3.185	2.787
PTH	0.379	1.042	2.801
STAT4	1.414	3.07	2.804
CCR2	-2.492	-0.613	2.813
Pam3-Cys-Ser-Lys4	2.77	3.19	2.813
EGF	3.511	4.937	2.832
P38 MAPK	1.523	2.532	2.848
E. coli B4 lipopolysaccharide	3.083	3.868	2.925
STING1	3.38	3.524	2.935
IFNE	3.434	3.434	2.967
IL27	3.533	3.791	2.967
IFNL4	3.122	3.278	2.974
PARP9	2.813	2.813	2.985
DOCK8	2.828	3.464	3
IFN type 1	2.577	3.07	3.087
TICAM1	3.639	4.368	3.094
TLR3	3.6	4.45	3.094
DDX58	3.04	3.589	3.146
ELAVL1	1.93	2.451	3.148
IL5	-0.308	3.208	3.148
JAK	3.162	3.317	3.162
SASH1	3	3.606	3.162
SAMSN1	3	3.606	3.162
SPI1	3.711	3.332	3.17
HIF1A	2.479	3.868	3.188
NFkB (complex)	4.26	4.971	3.226
IL21	3.464	3.818	3.253
ribavirin	3.302	2.716	3.302
TLR9	4.533	4.719	3.312
SYVN1	2.449	3.162	3.317
PAF1	3.464	3.742	3.317
F2	1.93	3.561	3.334
medroxyprogesterone acetate	-1.646	-0.107	3.341
SP1	-0.419	1.489	3.342
IFNA1/IFNA13	3.072	3.219	3.379
deferoxamine	2.779	4.12	3.383
SMARCA4	1.774	2.712	3.407
bromodeoxyuridine	3.352	3.623	3.416
stallimycin	3.69	3.802	3.416
TLR7	4.232	4.859	3.422
mir-96	3.45	3.592	3.44
MAVS	3.529	3.668	3.554
mir-183	3.592	3.729	3.592
oblimersen	3.742	4.111	3.606
tetradecanoylphorbol acetate	4.057	5.393	3.643
IFNB1	3.38	3.892	3.649
CG	2.69	3.456	3.664
CpG ODN 2006	3.929	3.531	3.729
SENP3	3.592	3.86	3.729
AGT	-1.388	1.089	3.736
OSM	3.273	4.064	3.767
Ifn	3.78	4.247	3.77
IRF5	4.717	4.578	3.879
IL1B	5.919	7.32	3.944
EIF2AK2	4.281	4.692	3.948
RNY3	3.606	3.606	4
IFN Beta	3.553	3.968	4.45
TGM2	4.161	5.041	4.453
IRF3	4.349	4.735	4.606
IRF1	4.962	5.593	4.781
Ifnar	4.713	5.18	4.851
tretinoin	2.846	4.56	5.041
STAT1	4.662	5.296	5.074
PRL	2.433	2.591	5.182
Interferon alpha	5.075	5.799	5.455
IRF7	5.338	6.174	5.511
TNF	5.283	7.22	5.519
IFNL1	5.367	5.809	5.64
poly rI:rC-RNA	6.183	7.087	5.948
IFNG	7.316	8.629	6.302
IFNA2	6.068	6.667	6.676
lipopolysaccharide	6.341	8.57	6.979
EGLN	N/A	-3.367	N/A
glutamine	-1.709	-3.104	N/A
geldanamycin	-1.414	-3.046	N/A
NEUROG1	-1.633	-3	N/A
Bay 11-7082	-2.396	-2.932	N/A
AS1842856	-1.633	-2.813	N/A
bisindolylmaleimide I	-1.352	-2.762	N/A
PP2/AG1879 tyrosine kinase inhibitor	-2.241	-2.657	N/A
DACH1	N/A	-2.613	N/A
torin1	N/A	-2.6	N/A
CITED2	N/A	-2.597	N/A
RPSA	-1.982	-2.596	N/A
SAFB	-2.236	-2.449	N/A
infliximab	-1.982	-2.433	N/A
sorafenib	-1.664	-2.433	N/A
NT5E	-1.982	-2.425	N/A
PS-1145	-1.961	-2.415	N/A
etanercept	-2.213	-2.412	N/A
baicalein	-1.982	-2.412	N/A
STK40	N/A	-2.403	N/A
glucosamine	-1.954	-2.396	N/A
NOTCH2	-1.206	-2.383	N/A
resolvin D1	N/A	-2.378	N/A
anakinra	-1.945	-2.373	N/A
bexarotene	-1.783	-2.37	N/A
RORA	-2.359	-2.359	N/A
TFRC	N/A	-2.335	N/A
diphenyleneiodonium	-1.362	-2.309	N/A
ZFP36	-1.726	-2.28	N/A
Hdac	N/A	-2.253	N/A
TEAD2	-2.828	-2.236	N/A
SPINDOC	-2	-2.236	N/A
Ptprd	N/A	-2.236	N/A
asciminib	N/A	-2.236	N/A
TFAM	N/A	-2.236	N/A
calphostin C	-2.261	-2.222	N/A
Go 6976	-2.2	-2.22	N/A
CNOT7	-1.982	-2.219	N/A
CIDEC	N/A	-2.219	N/A
CIP2A	N/A	-2.219	N/A
mir-181	-2.213	-2.216	N/A
PDCD4	-2.213	-2.213	N/A
mir-515	N/A	-2.213	N/A
CYP7A1	-1.96	-2.2	N/A
baicalin	-1.633	-2.2	N/A
GNA12	N/A	-2.2	N/A
propofol	N/A	-2.2	N/A
YAP/TAZ	N/A	-2.2	N/A
miR-16-5p (and other miRNAs w/seed AGCAGCA)	N/A	-2.191	N/A
parthenolide	N/A	-2.19	N/A
KLF5	-0.747	-2.184	N/A
NOTCH4	N/A	-2.183	N/A
CDH1	-1.982	-2.18	N/A
suramin	N/A	-2.177	N/A
mir-143	-1.941	-2.176	N/A
TO-901317	-2.25	-2.169	N/A
mir-373	N/A	-2.15	N/A
l-asparaginase	-0.707	-2.111	N/A
H89	-2.215	-2.028	N/A
MRTFB	-2.637	-2.019	N/A
NVP-TAE684	-2	-2	N/A
8-oxo-7-hydrodeoxyguanosine	-1.982	-2	N/A
SAFB2	N/A	-2	N/A
elovanoid N34	N/A	-2	N/A
LRBA	N/A	-2	N/A
TXNRD1	N/A	-2	N/A
CBX7	N/A	-2	N/A
COPA	N/A	-2	N/A
Mt2	N/A	-2	N/A
DGCR8	N/A	-1.997	N/A
FGF12	N/A	-1.997	N/A
PRTN3	N/A	-1.996	N/A
UBA7	N/A	-1.992	N/A
PTPN6	N/A	-1.991	N/A
tosylphenylalanyl chloromethyl ketone	N/A	-1.991	N/A
EIF4EBP1	N/A	-1.987	N/A
2-(4-acetoxyphenyl)-2-chloro-N-methylethylamine	N/A	-1.986	N/A
daidzein	N/A	-1.982	N/A
CRBN	N/A	-1.982	N/A
ibrutinib	N/A	-1.982	N/A
MIR143-145a	N/A	-1.982	N/A
UM101	N/A	-1.982	N/A
UCP2	N/A	-1.982	N/A
ARHGAP5	N/A	-1.982	N/A
verapamil	N/A	-1.982	N/A
thioctic acid	N/A	-1.982	N/A
PTPN22	N/A	-1.981	N/A
bempedoic acid	N/A	-1.98	N/A
UBE3A	N/A	-1.98	N/A
ARRB2	N/A	-1.98	N/A
T 0070907	N/A	-1.98	N/A
KN-62	N/A	-1.98	N/A
gemfibrozil	N/A	-1.98	N/A
K-252	N/A	-1.98	N/A
piceatannol	N/A	-1.977	N/A
CFTR	-1.118	-1.976	N/A
CBL	N/A	-1.974	N/A
HDAC11	-1.97	-1.97	N/A
2-amino-5-phosphonovaleric acid	-1	-1.969	N/A
resolvin D2	N/A	-1.969	N/A
dexmedetomidine	N/A	-1.969	N/A
mir-22	N/A	-1.969	N/A
SENP2	N/A	-1.964	N/A
TPCA-1	N/A	-1.964	N/A
SRT1720	N/A	-1.964	N/A
Mt1	N/A	-1.961	N/A
caffeic acid phenethyl ester	-1.99	-1.906	N/A
IGF2BP1	-2.236	-1.89	N/A
FBXO32	-2.178	-1.82	N/A
MEOX2	-2.414	-1.808	N/A
TEAD1	-2.333	-1.744	N/A
carbon monoxide	-1.993	-1.727	N/A
WBP2	-2.828	-1.726	N/A
salicylic acid	-2.19	-1.717	N/A
TEAD4	-2.646	-1.664	N/A
TEAD3	-2.828	-1.633	N/A
apigenin	-2.215	-1.501	N/A
Notch	-1.964	-1.372	N/A
ursodeoxycholic acid	-2.611	-1.369	N/A
androgen	-1.964	-1.334	N/A
CFLAR	-2.207	-1.308	N/A
ROCK1	-2.178	-1.254	N/A
selumetinib	-1.982	-1.195	N/A
ATF3	-2	-1.089	N/A
green tea polyphenol	-1.982	-1.067	N/A
SREBF2	-2.183	-1.039	N/A
BMP4	-2.288	-0.78	N/A
SREBF1	-2.378	-0.623	N/A
NORAD	-2.449	-0.447	N/A
miR-450a-5p (and other miRNAs w/seed UUUGCGA)	2	-0.447	N/A
ASPSCR1-TFE3	-2.121	-0.378	N/A
ERN1	1.98	0.397	N/A
COL5A1	2.236	0.447	N/A
CR1L	2.158	0.512	N/A
FBN1	1.997	0.739	N/A
SAV1	2	0.762	N/A
miR-335-3p (miRNAs w/seed UUUUCAU)	2.449	0.816	N/A
S-nitroso-N-acetyl-DL-penicillamine	1.961	0.823	N/A
TBX2	2	0.971	N/A
nocodazole	1.982	0.985	N/A
CDK19	2.236	1	N/A
miR-338-3p (miRNAs w/seed CCAGCAU)	2.646	1.134	N/A
TRPM2	2.2	1.219	N/A
gemcitabine	2.222	1.292	N/A
CUL3	2.219	1.342	N/A
mir-133	2.236	1.342	N/A
adenosine	2.2	1.4	N/A
deoxycholate	1.972	1.467	N/A
TSH	1.982	1.746	N/A
TNFRSF1B	1.982	1.883	N/A
SIRT6	1.97	1.886	N/A
fatty acid	0.913	1.961	N/A
BSG	1.949	1.961	N/A
methamphetamine	1.98	1.961	N/A
CXCR4	N/A	1.961	N/A
NDRG1	N/A	1.962	N/A
chrysotile asbestos	1.091	1.964	N/A
peroxynitrite	N/A	1.964	N/A
LGALS9	N/A	1.964	N/A
CYBA	N/A	1.964	N/A
TCIM	N/A	1.964	N/A
galactosylceramide-alpha	N/A	1.964	N/A
mir-130	N/A	1.965	N/A
TGIF1	N/A	1.966	N/A
USP7	N/A	1.966	N/A
FASLG	N/A	1.968	N/A
ERVW-1	N/A	1.969	N/A
NOS1	N/A	1.969	N/A
CDK9	N/A	1.969	N/A
6-formylindolo[3,2-b]carbazole	N/A	1.969	N/A
taurocholic acid	N/A	1.969	N/A
PTHLH	0.154	1.972	N/A
IL17a dimer	N/A	1.973	N/A
Usp17la (includes others)	N/A	1.973	N/A
CCL3	N/A	1.974	N/A
EREG	N/A	1.974	N/A
Focal adhesion kinase	1.992	1.976	N/A
TYROBP	N/A	1.976	N/A
PLAGL1	N/A	1.98	N/A
Lymphotoxin	N/A	1.98	N/A
RHOB	N/A	1.98	N/A
ELANE	N/A	1.98	N/A
TIFA	N/A	1.98	N/A
TGFA	N/A	1.981	N/A
lipid A	N/A	1.981	N/A
IFIT2	N/A	1.982	N/A
STAT	N/A	1.982	N/A
leukotriene B4	N/A	1.982	N/A
SN-38	N/A	1.982	N/A
KAT5	N/A	1.982	N/A
TLR1	N/A	1.985	N/A
B4GALT6	N/A	1.987	N/A
NR4A2	N/A	1.987	N/A
TFE3	N/A	1.987	N/A
GnRH-A	N/A	1.987	N/A
Cdk	N/A	1.987	N/A
HEY2	N/A	1.988	N/A
IL1R1	2.186	1.991	N/A
butaprost	N/A	1.992	N/A
PLA2G2A	N/A	1.992	N/A
FAT1	1.96	1.993	N/A
IL36A	N/A	1.993	N/A
MAP3K8	N/A	1.996	N/A
NFKB2	1.445	1.997	N/A
PIN1	1.505	1.999	N/A
Collagen type IV	1	2	N/A
ATXN3	2	2	N/A
HSPA9	2	2	N/A
FOXL2	2.438	2	N/A
CAPN3	N/A	2	N/A
BTC	N/A	2	N/A
TSC22D1	N/A	2	N/A
RNF138	N/A	2	N/A
CNR2	N/A	2	N/A
JUND	N/A	2	N/A
Angiotensin II receptor type 1	N/A	2	N/A
IL-17f dimer	N/A	2	N/A
BRD2	N/A	2	N/A
KAT2A	N/A	2	N/A
poly-L-lysine	N/A	2	N/A
cadmium chloride	N/A	2	N/A
cardiotoxin	N/A	2	N/A
formaldehyde	N/A	2	N/A
TLR7/8	N/A	2	N/A
5-hydroxytryptamine	0.973	2.018	N/A
DETA-NONOate	1.524	2.027	N/A
CD36	1.551	2.028	N/A
MAPK7	1.981	2.039	N/A
10E,12Z-octadecadienoic acid	-0.268	2.041	N/A
arachidonic acid	1.992	2.048	N/A
PDGFB	1.229	2.049	N/A
IL33	2.435	2.063	N/A
MTOR	N/A	2.07	N/A
MAPK14	1.658	2.078	N/A
uric acid	1.216	2.09	N/A
SCARB1	1.279	2.111	N/A
MAP3K1	1.102	2.114	N/A
palmitic acid	0.851	2.146	N/A
arsenite	N/A	2.149	N/A
N-acetylmuramyl-L-alanyl-D-isoglutamine	1.916	2.153	N/A
Nfat (family)	1.534	2.156	N/A
mevalonic acid	1.967	2.158	N/A
PLG	1.309	2.159	N/A
BIRC3	N/A	2.159	N/A
NAMPT	N/A	2.168	N/A
LGALS8	N/A	2.169	N/A
LEP	0.459	2.172	N/A
leukotriene D4	N/A	2.176	N/A
CALCA	1.981	2.177	N/A
IL17F	N/A	2.179	N/A
GRP	1.94	2.18	N/A
enterotoxin B	1.179	2.181	N/A
POMC	N/A	2.181	N/A
silicon dioxide	N/A	2.183	N/A
lipoteichoic acid	1.237	2.187	N/A
RET	0.841	2.19	N/A
dalfampridine	N/A	2.191	N/A
MAPK10	N/A	2.193	N/A
PGF	N/A	2.198	N/A
ZBP1	2	2.2	N/A
TRADD	N/A	2.2	N/A
daunorubicin	N/A	2.2	N/A
EIF2AK3	N/A	2.2	N/A
HEY1	N/A	2.201	N/A
RIPK2	2.379	2.207	N/A
MAFB	N/A	2.207	N/A
cytarabine	1.369	2.213	N/A
PCDH11Y	N/A	2.213	N/A
Ige	1.063	2.214	N/A
N-formyl-Met-Leu-Phe	1.981	2.219	N/A
ACTN4	N/A	2.219	N/A
ACTG1	N/A	2.219	N/A
collagenase	N/A	2.219	N/A
TNFSF13B	N/A	2.219	N/A
di(2-ethylhexyl) phthalate	N/A	2.219	N/A
SD6	2.224	2.224	N/A
SAA	1.991	2.228	N/A
NfkB-RelA	1.992	2.229	N/A
poly dA-dT	1.996	2.23	N/A
ESRRG	N/A	2.231	N/A
EWSR1-FLI1	2.826	2.233	N/A
SPIN1	2	2.236	N/A
CHD1	2	2.236	N/A
TNK1	2	2.236	N/A
ARHGAP21	2	2.236	N/A
HBEGF	N/A	2.236	N/A
SELPLG	N/A	2.236	N/A
PSME3	N/A	2.236	N/A
1-palmitoyl-2-(5-oxovaleroyl)-sn-glycero-3-phosphorylcholine	1.953	2.253	N/A
TRAF6	1.801	2.254	N/A
CCN1	1.528	2.285	N/A
CCL11	2.072	2.288	N/A
MTORC1	1.051	2.3	N/A
histamine	1.11	2.332	N/A
nickel chloride	N/A	2.356	N/A
vinblastine	1.98	2.364	N/A
CLEC7A	1.948	2.369	N/A
25-hydroxycholesterol	2.412	2.371	N/A
NFkB (family)	1.929	2.374	N/A
CD14	2.205	2.385	N/A
CpG ODN 1668	2.412	2.386	N/A
1-methyl-4-phenyl-1,2,3,6-tetrahydropyridine	1.487	2.39	N/A
tetrachlorodibenzodioxin	1.622	2.391	N/A
bicuculline	N/A	2.391	N/A
sodium arsenite	N/A	2.392	N/A
mitoxantrone	1.953	2.393	N/A
IL12 (family)	1.969	2.396	N/A
XIAP	N/A	2.396	N/A
IRF6	2.213	2.4	N/A
D-galactosamine	1.076	2.401	N/A
ALB	0.845	2.406	N/A
phorbol 12,13-dibutyrate	N/A	2.41	N/A
NfkB1-RelA	1.957	2.411	N/A
Ni2+	N/A	2.412	N/A
okadaic acid	2.2	2.42	N/A
MMP1	1.948	2.421	N/A
cis-urocanic acid	1.987	2.425	N/A
thapsigargin	0.213	2.429	N/A
MAP2K4	N/A	2.43	N/A
LTA	N/A	2.433	N/A
BHLHE40	2	2.449	N/A
mono-(2-ethylhexyl)phthalate	N/A	2.449	N/A
KITLG	2.019	2.524	N/A
ionomycin	2.221	2.524	N/A
TLR2	1.91	2.525	N/A
lysophosphatidylinositol	2.646	2.53	N/A
NEDD9	N/A	2.53	N/A
Ca2+	2.093	2.547	N/A
Pam3-Cys	N/A	2.551	N/A
BDNF	-0.107	2.554	N/A
carrageenan	2.387	2.554	N/A
platelet activating factor	2.31	2.571	N/A
ELK1	1.72	2.577	N/A
MAPK3	1.939	2.577	N/A
calcimycin	2.188	2.579	N/A
Fcer1	2.408	2.591	N/A
MAP2K3	2.391	2.6	N/A
PPRC1	1.915	2.611	N/A
Hif1	N/A	2.619	N/A
KDM8	N/A	2.621	N/A
MAP2K6	N/A	2.639	N/A
TNFSF12	2.273	2.645	N/A
Tlr	2.592	2.74	N/A
TAC1	2.169	2.743	N/A
peptidoglycan	2.397	2.748	N/A
Mapk	2.186	2.752	N/A
SPP1	2.273	2.754	N/A
MAP3K14	2.142	2.762	N/A
BMP6	1.761	2.765	N/A
IL3	2.008	2.778	N/A
NOD2	2.22	2.781	N/A
laminaran	2.433	2.813	N/A
CASR	0	2.828	N/A
C11orf95-RELA	2.236	2.828	N/A
IFI16	2.574	2.844	N/A
E. coli lipopolysaccharide	2.377	2.907	N/A
ECSIT	2.382	2.922	N/A
IL18	2.443	2.935	N/A
MET	2.376	2.97	N/A
CCL5	1.905	2.976	N/A
PTGS2	2.47	2.983	N/A
BCR-ABL1	N/A	3	N/A
IL22	2.298	3.018	N/A
JAK2	2.349	3.042	N/A
Lh	2.275	3.056	N/A
CpG oligonucleotide	2.429	3.089	N/A
TNFRSF1A	1.351	3.098	N/A
phorbol esters	2.606	3.111	N/A
resiquimod	2.915	3.221	N/A
JUNB	2.646	3.296	N/A
CD28	2.388	3.496	N/A
N-acetylsphingosine	2.942	3.532	N/A
CD40	3.071	3.66	N/A
TNFSF11	2.935	3.86	N/A
RAF1	2.683	3.987	N/A
kaempferol	-2	N/A	N/A
DUSP5	-2	N/A	N/A
ID1	1.969	N/A	N/A
dasatinib	1.969	N/A	N/A
SRC (family)	1.969	N/A	N/A
NPPB	1.98	N/A	N/A
lipoarabinomannan	2	N/A	N/A
EWSR1	2	N/A	N/A
TP53COR1	2	N/A	N/A
dpi= Days post infection
