# Supplementary material for: Zika Virus Infection of Sertoli Cells Alters Protein Expression Involved in Activated Immune and Antiviral Response Pathways, Carbohydrate Metabolism and Cardiovascular Disease
Source: Viruses. 2022 Feb 11;14(2):377. doi: 10.3390/v14020377 (PMC8878972; doi:10.3390/v14020377)
Supplement: Supplementary file 1 [file viruses-14-00377-s001.zip › viruses-1572177-Table S3.xls]

## Sheet: Sheet0
© 2000-2021 QIAGEN. All rights reserved.
ID	Molecules in Network	Score	Focus Molecules	Top Diseases and Functions
1	CNN2,CNN3,COL12A1,COL1A1,COL23A1,COL28A1,COL2A1,COL3A1,COL4A6,COL5A1,collagen,Collagen type II,Collagen type III,Collagen(s),collagenase,Cpla2,CREB3L1,CTSS,ENAM,ERK,FABP3,Fibrin,HSD11B1,Hsp27,IgG2c,ITGA11,LUM,Osteocalcin,PCOLCE,PDLIM2,PHLDA1,RGS5,SPARC,TCF,ZFP36L1	38	23	[Cancer, Connective Tissue Disorders, Organismal Injury and Abnormalities]
2	14-3-3,AKR1D1,ALDH1A3,ANK3,CD3,DDX60L,DENND6A,Growth hormone,GRPEL2,HERC5,HERC6,IFI44,IFIT2,IFIT3,ISG15,ISG20,Mek,Mitochondrial complex 1,MX1,MX2,Nfat (family),Ngf,PSAP,Raf,Rap1,RAS,RBM3,Shc,SLC43A3,SOD2,Sos,TCR,TOP2A,UBE2L6,ZNF133	36	22	[Dermatological Diseases and Conditions, Organismal Injury and Abnormalities, Post-Translational Modification]
3	Actin,Actin alpha-Ca2 -Myosin-Tropomyosin-TroponinC-Troponin I-Troponin T,Alpha Actinin,Alpha catenin,ARC,Cadherin,CALD1,CDH8,CSRP2,Cytokeratin,Erm,estrogen receptor,FANCI,Keratin,KRT18,KRT7,KRT8,LAP3,LMOD1,MEF2,NT5E,OAS3,PI3K (complex),PRKAA,QSER1,RAB27B,RBIS,RNASET2,Rnr,SLC26A6,TIMP1,Tropomyosin,USP36,ZNF668,ZYX	34	21	[Cell Morphology, Cellular Assembly and Organization, Cellular Compromise]
4	26s Proteasome,AMPK,APOBEC3G,CG,CXCL8,EIF1,Eif2,FILIP1L,FSH,FUT9,GK,GNRH,HMGCR,Hsp70,IFI6,Interferon alpha,KNL1,Lh,Nos,OS9,P-TEFb,PHF11,Pka,PTGS2,RNA polymerase II,RNF213,SAMD9,SP110,STAT1,TPM1,TPM2,TPM4,TRIAP1,Ubiquitin,UNC93B1	34	21	[Cellular Assembly and Organization, Cellular Function and Maintenance, Infectious Diseases]
5	ACAC,ADAMTSL4,BID,C1q,C1QTNF5,calpain,Cathepsin,Cebp,CMPK2,CTSA,CTSD,CTSZ,Fcgr3,GOT,growth factor,IgG2a,IgG2b,IL1B,IL4I1,ISL1,KIF16B,KIF1A,Lysosomal Protease,Mucin,MVP,PLSCR1,RASAL1,SAA,SCN9A,Serine Protease,SLC39A14,sPla2,TNFAIP8L2,TPP1,YAP/TAZ	29	19	[Hereditary Disorder, Neurological Disease, Organismal Injury and Abnormalities]
6	Akt,ASAH1,c-Src,C8,CALC,CDCP1,chymotrypsin,COL1A2,COL4A1,COL5A2,Collagen Alpha1,CPA4,DNA-methyltransferase,DNASE2,elastase,FBN1,FBN2,GM2A,GPIIB-IIIA,GPNMB,HIVEP3,MAC,MFAP4,MIRLET7,Pdgf Ab,PRC2,RPS6KA,secreted MMP,SLIT3,ST3GAL1,TFPI2,THBS2,Thrombospondin,trypsin,TTC3	27	18	[Connective Tissue Disorders, Developmental Disorder, Hereditary Disorder]
7	Alp,ARHGAP24,CDV3,CNN1,Collagen type IV,EGLN,Fcer1,Fgf,Fibrinogen,FOSL1,HEG1,Ige,Integrin alpha V beta 3,KMO,LRP,MCF2L,MED10,MED13L,mediator,NDUFAF8,OSBPL2,Pdgf (complex),PDGF BB,Pkc(s),PLA2,PLA2G12A,PLAUR,PLC gamma,PPT1,ROCK,Smad2/3,STARD7,STC1,TAGLN,TGFB2	27	18	[Connective Tissue Disorders, Developmental Disorder, Hereditary Disorder]
8	ALB,Angiotensin II receptor type 1,CCDC80,CLU,FADS2,Iga,IgG,IgG1,Igm,IL33,INTERLEUKIN,Ldh (complex),LDL,LDL-cholesterol,MOCOS,N-cor,NPC2,Nr1h,P38 MAPK,p70 S6k,PI3K (family),PLIN2,PLS3,POU2F2,Rar,RBM47,Rxr,SCD,SERPINB2,Sod,TNIP1,TP53I3,TREX1,TRIM21,ZCCHC24	27	18	[Lipid Metabolism, Molecular Transport, Small Molecule Biochemistry]
9	AMOT,ARNT2,C15orf48,Calcineurin A,Calcineurin protein(s),CaMKII,Ck2,CMC4,Cofilin,Creb,FBXO11,Gsk3,GTPase,GXYLT1,H2BC1,Hdac,ICAM1,ITPR,MANBA,Mlc,MTMR2,NFAT (complex),NfkB-RelA,PAWR,phosphatase,Pkg,PP1 protein complex group,PP2A,PRKD2,RASSF8,RGS12,RPL3L,TIMM13,TIMM8B,TMA7	27	18	[Auditory and Vestibular System Development and Function, Cellular Assembly and Organization, Nervous System Development and Function]
10	ACTG1,ADARB2,ANK3,ANLN,CEP131,CMYA5,DNAH5,ERH,GTPBP1,H2BC9,H3C6,HBG1,KIF11,MCM2,MISP,MOCS1,MYO3A,NCBP2AS2,PCID2,PDZD7,PHACTR1,PSMD14,PUM3,RP1,RPL15,RPL18A,RPL32,RPL3L,SBNO1,SPTBN4,UBR7,WASHC4,ZNF263,ZNF385D,ZNF469	27	18	[Auditory Disease, Hereditary Disorder, Neurological Disease]
11	ANGPTL4,Ap2,APOL1,Apolipoprotein,ATP5MC2,CGREF1,EPSTI1,Ferritin,Fetal Hemoglobin,GC,GFPT2,HBA1/HBA2,HBB,HBG1,HDL,HDL-cholesterol,hemoglobin,Hif,Ho,IFN Lambda,Ikk (family),IL23,IRF,lipase,LIPG,Lymphotoxin,NFkB (complex),peptidase,PTMS,SAR1A,SERF2,Sphk,TMOD2,Tnf receptor,VLDL-cholesterol	21	15	[Cardiovascular Disease, Cell Death and Survival, Connective Tissue Disorders]
12	ADCY,ADCY10,ADRB,ATPase,CCN2,CTHRC1,Ecm,F2RL1,Focal adhesion kinase,FZD2,G protein alpha,G protein alphai,G protein beta gamma,G-protein gamma,GNG11,Gpcr,Integrin,Integrin alpha 3 beta 1,Iti,NfkB1-RelA,Pak,PDCL,PLAU,PLC,PTX3,Rac,RAC2,RRM2,Secretase gamma,SERP1,SRC (family),THBS1,Vegf,VEGFC,VTN	21	15	[Cardiovascular System Development and Function, Organismal Development, Tissue Morphology]
13	BECN1,BST2,CCDC61,chemokine,CIRBP,Collagen type I (complex),collagen type i (family),DDX58,DDX60,EIF2AK2,HABP2,Hif1,IFI35,IFIH1,IFIT1,Ifn,Ifn gamma,IFNGR,IL1,Interferon-α Induced,JAK,LGALS9,Mapk,MHC II,Mmp,NFkB (family),Notch,Pro-inflammatory Cytokine,PROTEASE,SPIRE2,Tgf beta,Tnf (family),TNFAIP3,TSH,xanthine oxidase	19	14	[Connective Tissue Disorders, Immunological Disease, Inflammatory Disease]
14	Aldose Reductase,BCR (complex),C/EBP,Caspase 3/7,Cdc2,Cdk,CDK1,CKAP2,Cyclin A,Cyclin D,Cyclin E,cytochrome C,DTX3L,E2f,HISTONE,Histone H1,Histone h2a,Histone H2b,Jnk,MT2A,NAMPT,NPAT,PARP,PARP12,PARP14,PARP9,Ppp2c,Rb,RHOJ,Rsk,SAMHD1,SLBP,STAT1/3/5 dimer,transglutaminase,UHRF2	17	13	[Cell Cycle, Connective Tissue Disorders, Immunological Disease]
15	ABCA13,ACOT13,ANK3,AP3B2,beta-estradiol,CCDC177,cholesterol,COA4,DCAF6,DPP9,FAM47E,FOS,GNS,GTF2IRD1,H2-K2/H2-Q9,H2-M10.1 (includes others),H2-T3,Has,HDAC5,ion channel,IP6K1,MEG3,MHC,MHC with antigen,miR-17-5p (and other miRNAs w/seed AAAGUGC),MYCBP2,NOTCH4,NUBP1,PAMR1,RT1-EC2,SLURP1,SMPDL3A,STK31,TAGLN3,VIM	17	13	[Cellular Development, Neurological Disease, Psychological Disorders]
16	ACADVL,BRWD1,caspase,CCND1,DHRS2,DTL,HIBCH,IFI44L,INK4,KLHL5,LRRC17,miR-17-5p (and other miRNAs w/seed AAAGUGC),mir-25,miR-296-5p (miRNAs w/seed GGGCCCC),Mlc,MYC,NCAPD3,NDUFA4,OAS1,PDCD5,Pde4,PPARGC1A,Ppp1r15a,PRDM5,putrescine,RAC1,SH3RF3,SLIT3,SNX31,STAP2,SVEP1,TMSB15A,TP53,TRIAP1,UHRF2	17	13	[Cell Cycle, Connective Tissue Development and Function, Embryonic Development]
17	BTAF1,CDK11A,CDK13,CEBPZ,CHD2,CHD8,CIT,DIDO1,DMXL2,DOK4,DUOX1,EFCAB14,EGFR,ELAVL1,FAM219B,FBXO11,GDPGP1,H4C1,IL13,KDM2A,LILRA5,LUC7L3,MKK3/6,NFIA,OASL,OSGIN2,PRPF3,RAVER2,RBMXL3,RREB1,SLC35F6,TAF1L,TM9SF3,UNC80,ZNF395	16	12	[Developmental Disorder, Neurological Disease, Organismal Injury and Abnormalities]
18	B2M,B2m-Mhc1a,Cr3,EDIL3,ERK1/2,Fc gamma receptor,H-2db,HLA-A,Hla-abc,HLA-B,HLA-B27,HLA-C,HLA-F,IFN alpha/beta,IFN Beta,IFN type 1,Ifnar,IL12 (complex),Isg,ISGF3,JAK1/2,KIR,MHC Class I (complex),MHC CLASS I (family),MHC I-α,Oas,OAS2,PSMB9,Stat1-Stat2,Tap,TAP2,TAPBP,Tlr,TLR7/8,TYR	14	11	[Cell Death and Survival, Cellular Compromise, Immunological Disease]
19	ADAMTSL3,ADGRA2,Adgre4,ADGRG2,Calmodulin,CDK11B,CFAP251,CREB Signaling in Neurons,CTNNB1,EGF,Egfr-Erbb2,ESR2,FAM214B,FAM83G,GCSH,GPR32,HMCES,HSPB6,Ikb,inositol triphosphate,LYRM1,mir-25,NRCAM,NTRK1,NTSR1,PIK3R2,PPP1CA,PTEN,Rgs,RPS6KA4,SARS2,SORBS3,SYNPO2L,ZFYVE9,ZNF574	12	10	[Cancer, Organismal Injury and Abnormalities, Reproductive System Disease]
20	Ap1,Cbp/p300,CD274,cytokine,DSTYK,F Actin,Histone h3,Histone h4,HLA-DR,Hsp90,Igg3,IKK (complex),IL12 (family),Immunoglobulin,Insulin,JINK1/2,Laminin (complex),Lfa-1,LIPA,MAP2K1/2,MHC Class II (complex),MTORC1,P110,PI3K p85,Proinsulin,PTK,PTK7,Ras homolog,Sfk,SLC2A1,Smad,STAT,STAT5a/b,SYK/ZAP,TNFSF4	6	6	[Connective Tissue Disorders, Organismal Injury and Abnormalities, Tissue Morphology]
21	HAMP,ZNF132	2	1	[Developmental Disorder, Hematological Disease, Hereditary Disorder]

## Sheet: Sheet1
Table S3. The protein-protein networks effected by ZIKV infection at 3,5 and 7dpi in human Sertoli cells.
3dpi
Serial no	Top Diseases and Functions	Score	Focus Molecules	Molecules in Network
1	[Cancer, Connective Tissue Disorders, Organismal Injury and Abnormalities]	38	23	CNN2,CNN3,COL12A1,COL1A1,COL23A1,COL28A1,COL2A1,COL3A1,COL4A6,COL5A1,collagen,Collagen type II,Collagen type III,Collagen(s),collagenase,Cpla2,CREB3L1,CTSS,ENAM,ERK,FABP3,Fibrin,HSD11B1,Hsp27,IgG2c,ITGA11,LUM,Osteocalcin,PCOLCE,PDLIM2,PHLDA1,RGS5,SPARC,TCF,ZFP36L1
2	[Dermatological Diseases and Conditions, Organismal Injury and Abnormalities, Post-Translational Modification]	36	22	14-3-3,AKR1D1,ALDH1A3,ANK3,CD3,DDX60L,DENND6A,Growth hormone,GRPEL2,HERC5,HERC6,IFI44,IFIT2,IFIT3,ISG15,ISG20,Mek,Mitochondrial complex 1,MX1,MX2,Nfat (family),Ngf,PSAP,Raf,Rap1,RAS,RBM3,Shc,SLC43A3,SOD2,Sos,TCR,TOP2A,UBE2L6,ZNF133
3	[Cell Morphology, Cellular Assembly and Organization, Cellular Compromise]	34	21	Actin,Actin alpha-Ca2 -Myosin-Tropomyosin-TroponinC-Troponin I-Troponin T,Alpha Actinin,Alpha catenin,ARC,Cadherin,CALD1,CDH8,CSRP2,Cytokeratin,Erm,estrogen receptor,FANCI,Keratin,KRT18,KRT7,KRT8,LAP3,LMOD1,MEF2,NT5E,OAS3,PI3K (complex),PRKAA,QSER1,RAB27B,RBIS,RNASET2,Rnr,SLC26A6,TIMP1,Tropomyosin,USP36,ZNF668,ZYX
4	[Cellular Assembly and Organization, Cellular Function and Maintenance, Infectious Diseases]	34	21	26s Proteasome,AMPK,APOBEC3G,CG,CXCL8,EIF1,Eif2,FILIP1L,FSH,FUT9,GK,GNRH,HMGCR,Hsp70,IFI6,Interferon alpha,KNL1,Lh,Nos,OS9,P-TEFb,PHF11,Pka,PTGS2,RNA polymerase II,RNF213,SAMD9,SP110,STAT1,TPM1,TPM2,TPM4,TRIAP1,Ubiquitin,UNC93B1
5	[Hereditary Disorder, Neurological Disease, Organismal Injury and Abnormalities]	29	19	ACAC,ADAMTSL4,BID,C1q,C1QTNF5,calpain,Cathepsin,Cebp,CMPK2,CTSA,CTSD,CTSZ,Fcgr3,GOT,growth factor,IgG2a,IgG2b,IL1B,IL4I1,ISL1,KIF16B,KIF1A,Lysosomal Protease,Mucin,MVP,PLSCR1,RASAL1,SAA,SCN9A,Serine Protease,SLC39A14,sPla2,TNFAIP8L2,TPP1,YAP/TAZ
6	[Connective Tissue Disorders, Developmental Disorder, Hereditary Disorder]	27	18	Akt,ASAH1,c-Src,C8,CALC,CDCP1,chymotrypsin,COL1A2,COL4A1,COL5A2,Collagen Alpha1,CPA4,DNA-methyltransferase,DNASE2,elastase,FBN1,FBN2,GM2A,GPIIB-IIIA,GPNMB,HIVEP3,MAC,MFAP4,MIRLET7,Pdgf Ab,PRC2,RPS6KA,secreted MMP,SLIT3,ST3GAL1,TFPI2,THBS2,Thrombospondin,trypsin,TTC3
7	[Connective Tissue Disorders, Developmental Disorder, Hereditary Disorder]	27	18	Alp,ARHGAP24,CDV3,CNN1,Collagen type IV,EGLN,Fcer1,Fgf,Fibrinogen,FOSL1,HEG1,Ige,Integrin alpha V beta 3,KMO,LRP,MCF2L,MED10,MED13L,mediator,NDUFAF8,OSBPL2,Pdgf (complex),PDGF BB,Pkc(s),PLA2,PLA2G12A,PLAUR,PLC gamma,PPT1,ROCK,Smad2/3,STARD7,STC1,TAGLN,TGFB2
8	[Lipid Metabolism, Molecular Transport, Small Molecule Biochemistry]	27	18	ALB,Angiotensin II receptor type 1,CCDC80,CLU,FADS2,Iga,IgG,IgG1,Igm,IL33,INTERLEUKIN,Ldh (complex),LDL,LDL-cholesterol,MOCOS,N-cor,NPC2,Nr1h,P38 MAPK,p70 S6k,PI3K (family),PLIN2,PLS3,POU2F2,Rar,RBM47,Rxr,SCD,SERPINB2,Sod,TNIP1,TP53I3,TREX1,TRIM21,ZCCHC24
9	[Auditory and Vestibular System Development and Function, Cellular Assembly and Organization, Nervous System Development and Function]	27	18	AMOT,ARNT2,C15orf48,Calcineurin A,Calcineurin protein(s),CaMKII,Ck2,CMC4,Cofilin,Creb,FBXO11,Gsk3,GTPase,GXYLT1,H2BC1,Hdac,ICAM1,ITPR,MANBA,Mlc,MTMR2,NFAT (complex),NfkB-RelA,PAWR,phosphatase,Pkg,PP1 protein complex group,PP2A,PRKD2,RASSF8,RGS12,RPL3L,TIMM13,TIMM8B,TMA7
10	[Auditory Disease, Hereditary Disorder, Neurological Disease]	27	18	ACTG1,ADARB2,ANK3,ANLN,CEP131,CMYA5,DNAH5,ERH,GTPBP1,H2BC9,H3C6,HBG1,KIF11,MCM2,MISP,MOCS1,MYO3A,NCBP2AS2,PCID2,PDZD7,PHACTR1,PSMD14,PUM3,RP1,RPL15,RPL18A,RPL32,RPL3L,SBNO1,SPTBN4,UBR7,WASHC4,ZNF263,ZNF385D,ZNF469
11	[Cardiovascular Disease, Cell Death and Survival, Connective Tissue Disorders]	21	15	ANGPTL4,Ap2,APOL1,Apolipoprotein,ATP5MC2,CGREF1,EPSTI1,Ferritin,Fetal Hemoglobin,GC,GFPT2,HBA1/HBA2,HBB,HBG1,HDL,HDL-cholesterol,hemoglobin,Hif,Ho,IFN Lambda,Ikk (family),IL23,IRF,lipase,LIPG,Lymphotoxin,NFkB (complex),peptidase,PTMS,SAR1A,SERF2,Sphk,TMOD2,Tnf receptor,VLDL-cholesterol
12	[Cardiovascular System Development and Function, Organismal Development, Tissue Morphology]	21	15	ADCY,ADCY10,ADRB,ATPase,CCN2,CTHRC1,Ecm,F2RL1,Focal adhesion kinase,FZD2,G protein alpha,G protein alphai,G protein beta gamma,G-protein gamma,GNG11,Gpcr,Integrin,Integrin alpha 3 beta 1,Iti,NfkB1-RelA,Pak,PDCL,PLAU,PLC,PTX3,Rac,RAC2,RRM2,Secretase gamma,SERP1,SRC (family),THBS1,Vegf,VEGFC,VTN
5dpi
Serial no	Top Diseases and Functions	Score	Focus Molecules	Molecules in Network
1	[Cardiovascular Disease, Cell Death and Survival, Connective Tissue Disorders]	42	25	ADCY10,AMPK,Angiotensin II receptor type 1,ARNT2,CCDC57,CDR2,cytochrome-c oxidase,DTX2,GMPR,GPX3,GRPEL2,HABP2,HBA1/HBA2,HBB,HDL,Immunoglobulin,KIF2C,Lh,Mitochondrial complex 1,NDC80,NDUFA4,NPC2,NT5E,PLSCR1,PSEN2,RRM2,Secretase gamma,SERPINE1,SLC1A4,Sod,SOD2,SYT7,TMC7,Vegf,ZNF668
2	[Cell Morphology, DNA Replication, Recombination, and Repair, Embryonic Development]	42	25	Aldose Reductase,Atrial Natriuretic Peptide,C15orf48,CCDC80,CEP131,CG,COL1A1,cyclooxygenase,DCK,DDX60,DIS3L,EGLN,FOXQ1,GTPBP1,HK2,IFNGR,KIF4B,MARCKSL1,MISP,NCAPD3,NCBP2AS2,Nos,Pkc(s),Pkg,PODXL,PP2A,SAP30,SLF2,SLMAP,SMC2,SORT1,STC1,TIMM8B,UHRF2,ZNF550
3	[Antimicrobial Response, Infectious Diseases, Inflammatory Response]	42	25	ABCA5,Adaptor protein 1,ADCY,ANK3,CD274,CD44,CHMP5,CXCL8,DDX58,DHX58,Dynamin,G protein alpha,GABARAP,GLS,Hsp70,IFIH1,IFIT1,IFIT3,IL12 (family),Interferon alpha,ISG15,LAMTOR5,LAP3,MAP2K7,MGP,OAS1,OAS3,Proinsulin,Serine Protease,SP110,STAT1,STEAP1,TTI1,USP3,xanthine oxidase
4	[Connective Tissue Development and Function, Infectious Diseases, Post-Translational Modification]	40	24	ABCA12,AMPD3,ARC,C1q,ceramidase,CMPK2,DNA-methyltransferase,DTX3L,Hdac,HELZ2,HERC6,HISTONE,Histone h2a,Histone H2b,IL1B,Inflammasome (Nalp3, Asc, Casp1),LDHA,NAMPT,NASP,NMI,PARP,PARP10,PARP14,PARP9,PNPT1,PRC2,RNF114,SLBP,SLC43A3,Top2,UBA6,UBE2L6,UGCG,UHRF1,XAF1
5	[Cancer, Connective Tissue Disorders, Tissue Development]	29	19	CERT1,COL12A1,COL28A1,COL4A2,COL4A6,COL5A1,collagen,Collagen type I (complex),Collagen type II,Collagen type III,Collagen(s),collagenase,CTSS,ENAM,Eotaxin,ERK,FABP3,Fc gamma receptor,Fcgr3,Fgf,GLRX,HAPLN1,Integrinα,INTERLEUKIN,ITGA11,ITGA2,PCOLCE,PHLDA1,Pld,RPS6KA,SAMD9,SRGN,SRPX2,Tenascin,THEMIS2
6	[Cell Morphology, Embryonic Development, Hair and Skin Development and Function]	27	18	Ap1,CCNA2,Cyclin A,Cytokeratin,DES,EHD4,estrogen receptor,FEN1,growth factor,Histone H1,Hsp27,Keratin,KRT1,KRT18,KRT19,KRT5,KRT6C,KRT7,KRT8,KRT9,LRP,MAT1A,MCM4,MCM7,MEF2,Ngf,Notch,OXSR1,Pgk,PI3K (complex),PLAUR,PRKAA,Rb,Rsk,SAMHD1
7	[Gastrointestinal Disease, Hepatic System Disease, Organismal Injury and Abnormalities]	27	18	ARFIP2,chemokine,collagen type i (family),CXCL1,DMXL2,DRAP1,Ecm,EEF2K,ENO2,Fcer1,Growth hormone,GYS1,Integrin,LDL,LGALS9,LYN,Mapk,MME,NADPH oxidase,NDRG1,Par,PFKP,PKM,PROTEASE,Rab5,Rac,ROR1,SREBF2,T3-TR-RXR,TCF,TK1,TM7SF2,Tnf receptor,TSH,ZBTB38
8	[Connective Tissue Disorders, Immunological Disease, Inflammatory Disease]	21	15	ASAH1,BCR (complex),BST2,CCDC121,CD82,CEBPD,CFB,COL3A1,Fcgr2,GOT,hemoglobin,Ifn,IFN Beta,Iga,IgG,IgG1,IgG2a,IgG2b,Igg3,Igm,IL12 (complex),IL23,IL33,IL4I1,JAK,Ldh (complex),NAB1,P38 MAPK,PI3K (family),SERPINB2,Tlr,TNFSF4,TNIP1,TREX1,TRIM21
9	[Cancer, Hematological Disease, Immunological Disease]	21	15	ATM,CARMIL3,CCDC86,CD99L2,CHD2,EDNRB,FBN2,FRY,H1-0,HDAC4,HNRNPU,IFI44,IFI44L,MAP10,MCAT,MICB,mir-302,MX1,MX2,MYC,OASL,PRDM2,PYCR3,RBM47,Rfc,RNF4,RNY3,TMEM132A,TREX1,TSN,UTP18,Vla-4,WASHC4,WASHC5,ZNF384
7dpi
Serial no	Top Diseases and Functions	Score	Focus Molecules	Molecules in Network
1	[Antimicrobial Response, Infectious Diseases, Inflammatory Response]	41	22	ANTXR1,CD248,CMPK2,EHD4,ERK,HELZ2,IFI44,IFIT1,IFIT2,IFIT3,IFITM3,Ifn,IFN Beta,IFNGR,Iga,IL12 (complex),IRF,JAK,KIR,LGALS3BP,MX1,MYD88,OAT,P4HA1,PI3K (family),PJA2,PRC2,SAMHD1,Secretase gamma,SLC38A2,SP110,STAT1,Tlr,TREX1,TRIM21
2	[Cardiovascular Disease, Endocrine System Development and Function, Organ Development]	36	20	ACAC,Akt,Alp,AMIGO2,Ap2,ARRDC3,ASS1,AXL,CDK4/6,Collagen Alpha1,collagen type i (family),cytochrome C,ERBIN,ERRFI1,estrogen receptor,Hif1,HRNR,LGALS9,MEN1,Mt,MT1E,MT1G,NDRG1,NPC2,NT5E,Osteocalcin,Ppp2c,Pro-inflammatory Cytokine,Rb,RNF149,RNF24,SIKE1,SLC20A1,SLIRP,TMEM119
3	[Antimicrobial Response, Infectious Diseases, Inflammatory Response]	36	20	apyrase,DDX58,DTX3L,EIF2AK2,Enolase,EPSTI1,H2AF,H2AJ,IFI35,IFIH1,IFN alpha/beta,IFN Lambda,IFN type 1,Ifnar,Interferon-α Induced,Isg,ISG15,ISGF3,JAK1/2,NFkB (complex),NMI,Oas,OAS1,OAS2,OAS3,PARP10,PARP14,PARP9,PNPT1,PTMS,Stat1-Stat2,UBA7,UBE2L6,XAF1,xanthine oxidase
4	[Cell Cycle, Cell Death and Survival, Gene Expression]	31	18	ANGPTL8,BDNF,C1R,C1S,CCDC9B,DDX60L,DRAM1,GPR34,H2AJ,IFIT5,IFNG,IKBKB,LCMT1,LMO2,MAPT,MOCOS,MTO1,MX2,NPY,PARP14,PKR dimer,PPP4R1,PRKCB,Proinsulin,RABGGTB,RPL3L,SECISBP2L,selenomethionine,SLC6A1,SQSTM1,TCF7L2,TMEM45A,tretinoin,TTBK1,ZNF34
5	[Dermatological Diseases and Conditions, Immunological Disease, Organismal Injury and Abnormalities]	29	17	20s proteasome,AEBP1,BST2,C1q,C1R,C1S,CD55,COL1A2,COL2A1,Collagen type I (complex),Collagen type II,Collagen type III,Collagen type IV,Collagen type VI,Collagen(s),Complement component 1,Cyclin E,DCN,ENAM,ENG,ERK1/2,Fibrin,GPT2,Hla-abc,IFN alpha receptor,Kallikrein,MAP1LC3,MFAP5,Pdi,PLCB3,PSAT1,PSMB10,SERPING1,SMAD1/5,TAX1BP1
6	[Dermatological Diseases and Conditions, Immunological Disease, Inflammatory Disease]	29	17	B2M,B2m-Mhc1a,CCPG1,chemokine,Cofilin,F2RL1,G protein alpha,GOLPH3,H-2db,HLA-B,HLA-C,HLA-E,HLA-G,HPX,IFNGR1,Ige,IgG,IgG1,IgG2a,Igg3,Igm,IL12 (family),ITM2C,MCF2L,MCM7,MHC,MHC (Major Histocompatibility Complex),MHC I-α,P38 MAPK,Ras homolog,SLC15A3,SLC2A3,Tap,TMED3,TMEM263
7	[Cardiovascular Disease, Cell Cycle, Gastrointestinal Disease]	27	16	A2M,BNIP3L,CCN2,COL12A1,COL28A1,collagen,Complement,CSF1,CTSH,elastase,F3,GLUL,growth factor,HDL,HMGCS1,IFIT5,Jnk,MMP2,MYH11,Myosin,NEFH,p70 S6k,Pdgf (complex),PDGF BB,Pdgfra-Pdgfrb,PROTEASE,ROCK,SAA,Serine Protease,Smad,SPATA2,TCF,Tgf beta,trypsin,UGCG
8	[Antimicrobial Response, Infectious Diseases, Inflammatory Response]	24	15	ACOX1,ALDOA,AMPK,CD3,COX17,Cyclin A,cytokine,F Actin,HERC5,Hsp90,IFI44L,Ifn gamma,IgG2b,IL1,Immunoglobulin,Insulin,Interferon alpha,MCM2,MHC Class II (complex),MTORC1,MX2,PLIN4,PMAIP1,PRKAA,RSAD2,SAMD9,SLC1A5,SLC2A1,SRC (family),STAT,STAT5a/b,TCR,TDO2,TGOLN2,Vegf
9	[Lipid Metabolism, Nervous System Development and Function, Small Molecule Biochemistry]	20	13	26s Proteasome,ADRB,AHNAK2,BCR (complex),Calcineurin A,Calcineurin protein(s),CALCOCO2,calpain,CaMKII,CTSA,DR1,FOXO3,FRA10AC1,GALC,Gsk3,Hdac,Histone H2b,Hsp27,Hsp70,IKK (complex),MAOA,MEF2,MHC CLASS I (family),NQO1,OPTN,PARP,PI3K (complex),PP2A,PSAP,Shc,SLC8A1,Sod,Tnf receptor,TNIP1,Ubiquitin
10	[Cell Morphology, Embryonic Development, Hair and Skin Development and Function]	20	13	AMHR2,ANAPC15,ANAPC16,ANXA9,AR,biotin,C16orf87,CPLANE1,FANCD2,H4C1,KLHDC7B,KRT1,Krt10,Krt2,KRT25,KRT26,KRT32,KRT37,KRT9,LRPPRC,MEIOC,MMS22L,MT-ND3,MT-RNR1,MXRA8,NAV3,NCBP2AS2,NDUFA4L2,NIN,NOP9,NPHP1,NPHP4,NUDCD3,RXFP2,ZNF727
